# Supplementary material
Source: publisher figshare collection journal article supplement (https://gsapubs.figshare.com/ndownloader/files/27404276)

Qi Zhao, Yi Yan, Satoshi Tonai, Naotaka Tomioka, Peter D. Clift, Meor H. Amir Hassan, and Jasmi Hafiz Bin Abdul Aziz, 2021, A new K-Ar illite dating application to constrain the timing of subduction in West Sarawak, Borneo: GSA Bulletin, <https://doi.org/10.1130/B35895.1>.

## Supplemental Material

The supporting information in this document contains observed XRD patterns (black) and best matches (grey) generated by the program WILDFIRE for size fractions of our samples.

**Figure S1.** Best-fit WILDFIRE-generated patterns for the observed X-ray diffraction patterns for different size fractions of our samples from the study area. Black and gray lines show measured and best-fit patterns for random preparations, respectively. Unmatched peaks are quartz and non-illite clay minerals.

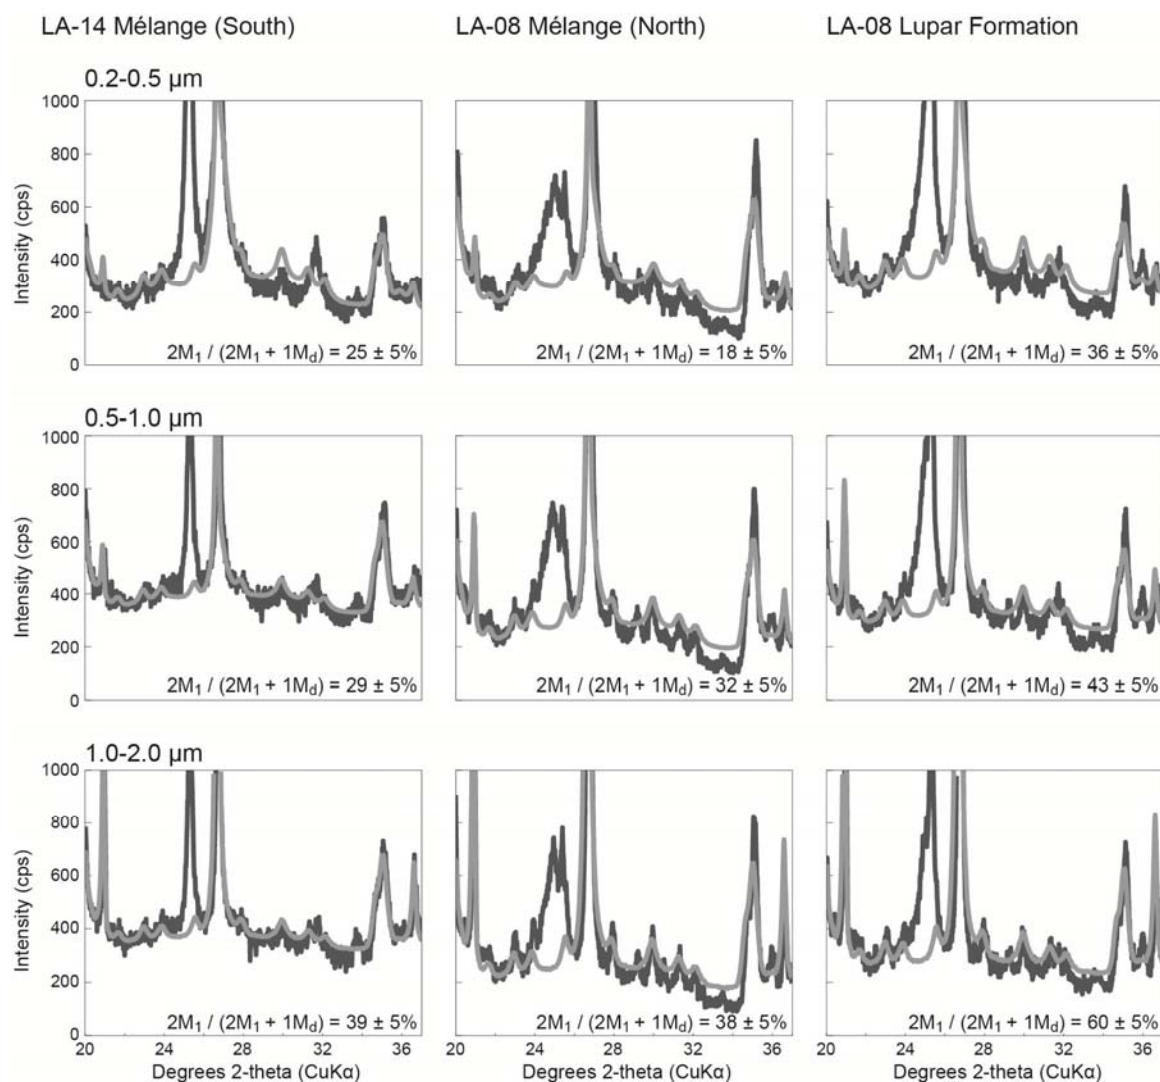

Supplement: Supplementary file 1 [file 27404276]
